# Supplementary figures and images for: Foxc1 dependent mesenchymal signalling drives embryonic cerebellar growth
Source: eLife journal article supplement (doi:10.7554/elife.03962), 2014-12-16

Figure 1 – Figure Supplement 1

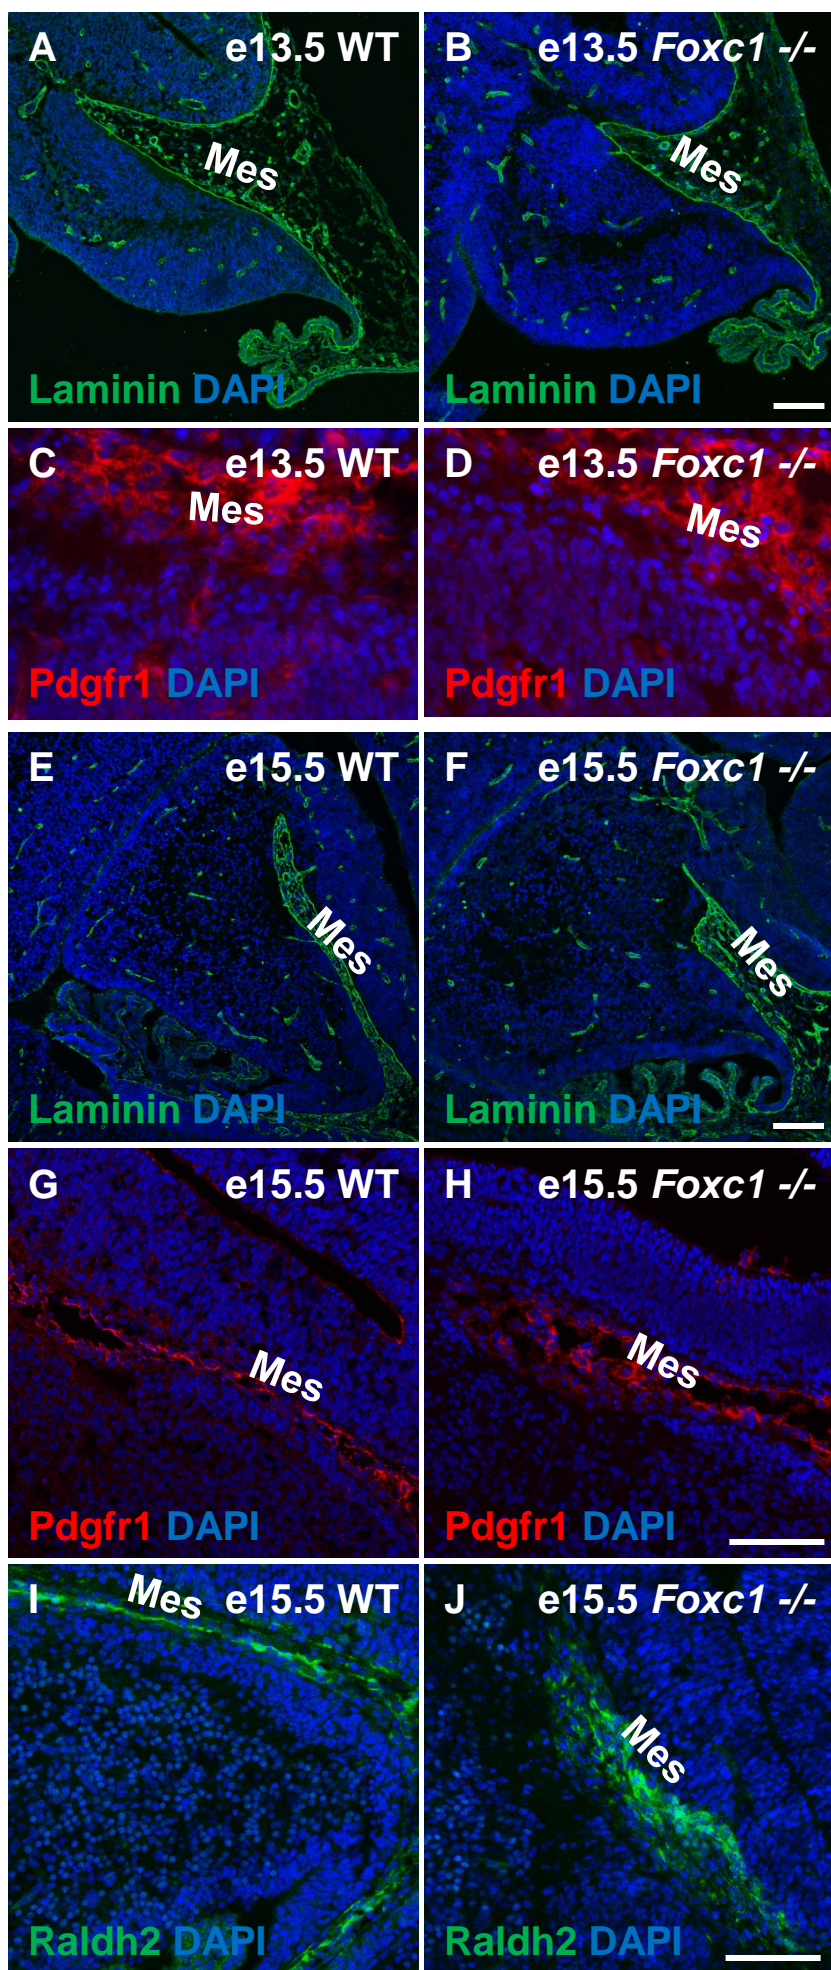

Supplement: supp [file elife_poa_e03962_Figure_1_figure_supplement_1.pdf › elife_poa_e03962_Figure_1_figure_supplement_1.pdf]

Figure 1 – Figure Supplement 2

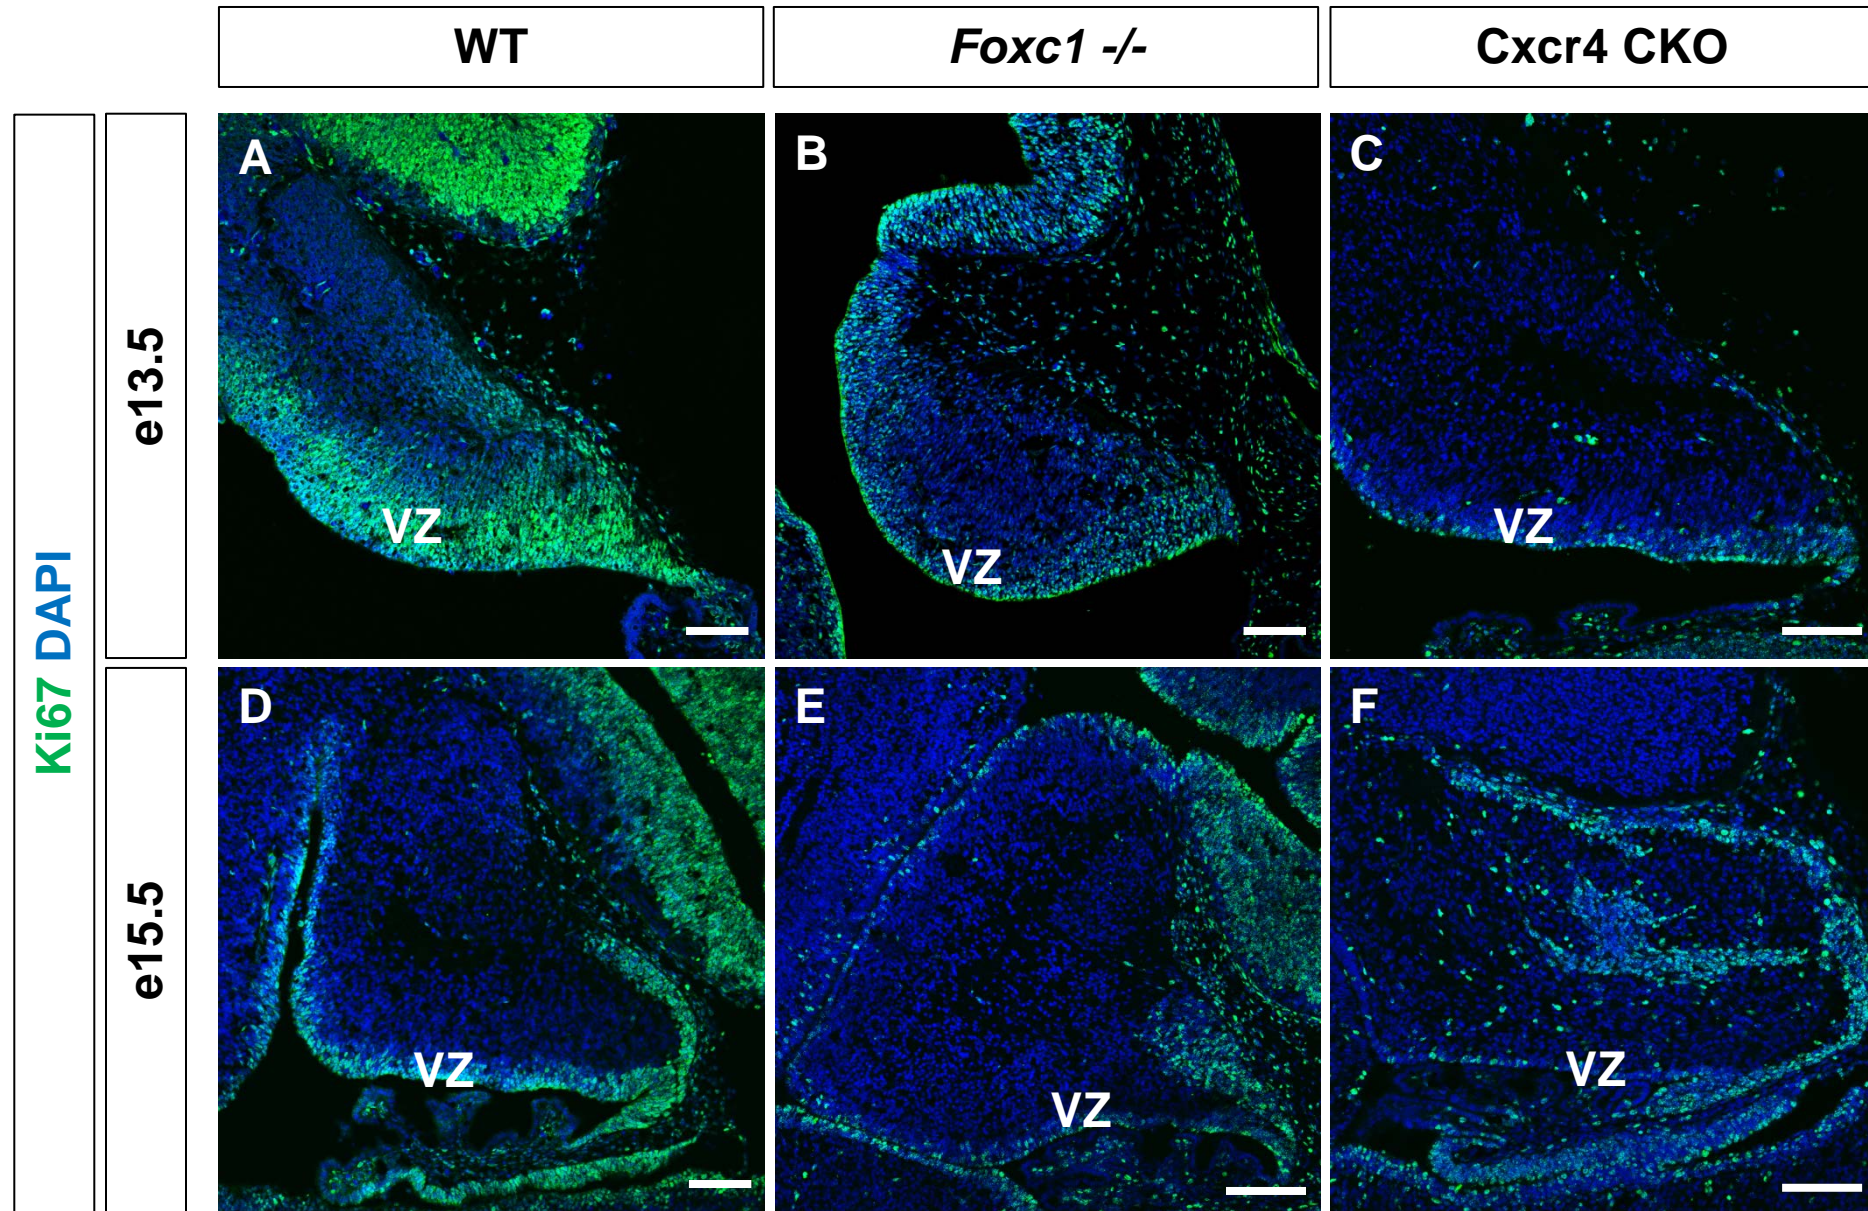

Supplement: supp [file elife_poa_e03962_Figure_1_figure_supplement_2.pdf › elife_poa_e03962_Figure_1_figure_supplement_2.pdf]
